# Supplementary material for: Monodisperse upconversion Er3+/Yb3+:MFCl (M = Ca, Sr, Ba) nanocrystals synthesized via a seed-based chlorination route
Source: Royal Society of Chemistry journal article supplement (doi:10.1039/c1cc13763h), 2011-01-01
Supplement: c1cc13763h.pdf [file c1cc13763h.pdf]

## Electronic Supplementary Information

# Monodisperse upconversion $\text{Er}^{3+}/\text{Yb}^{3+}$ : $\text{MFCl}$ ( $\text{M}=\text{Ca}$ , $\text{Sr}$ , $\text{Ba}$ ) nanocrystals synthesized via a seed-based chlorination route

Daqin Chen, Yunlong Yu, Feng Huang, Ping Huang, Anping Yang, Zhaoxing Wang<sup>&</sup>, Yuansheng Wang\*

\*State Key Laboratory of Structural Chemistry, Fujian Institute of Research on the Structure of Matter, Chinese Academy of Sciences, Fuzhou, Fujian 350002 (P. R. China); Corresponding author: [yswang@fjirsm.ac.cn](mailto:yswang@fjirsm.ac.cn)

<sup>&</sup>Present address: Fuzhou Overseas Chinese Middle School, Fuzhou 350004 (P. R. China)

### Experimental details

**Chemicals:** All chemicals were of analytical grade and were used as received without further purification. Deionized water was used throughout.  $\text{Sr}(\text{NO}_3)_2$ ,  $\text{MCO}_3$  ( $\text{M}=\text{Ca}$ ,  $\text{Sr}$ ,  $\text{Ba}$ ),  $\text{Yb}(\text{NO}_3)_3 \cdot 6\text{H}_2\text{O}$ ,  $\text{Er}(\text{NO}_3)_3 \cdot 6\text{H}_2\text{O}$ ,  $\text{Ln}_2\text{O}_3$  ( $\text{Ln}=\text{Yb}$ ,  $\text{Er}$ ), sodium oleate ( $\text{NaOA}$ ), cyclohexane, ethanol, and  $\text{HF}$  (40 wt%) were all supplied by Sinopharm Chemical Reagent Company. Oleic acid ( $\text{OA}$ ), trifluoroacetic acid ( $\text{CF}_3\text{COOH}$ ,  $\text{TFA}$ ), trichloroacetic acid ( $\text{CCl}_3\text{COOH}$ ,  $\text{TCA}$ ), tribromoacetic acid ( $\text{CBr}_3\text{COOH}$ ,  $\text{TBA}$ ) and 1-octadecene ( $\text{ODE}$ ) were purchased from Aladdin Chemical Reagent Company.

**Preparation of  $\text{M}(\text{CF}_3\text{COO})_2$  and  $\text{Ln}(\text{CF}_3\text{COO})_3$  precursors:** The metal trifluoroacetates were prepared from the corresponding metal oxides and  $\text{TFA}$  followed by the literature method (Roberts, J. E. J. Am. Chem. Soc., 1961, 83, 1087). In a typical synthesis of  $\text{M}(\text{CF}_3\text{COO})_2$ , 4 mmol of  $\text{MCO}_3$  were added into a solution containing 10 mL  $\text{H}_2\text{O}$  and 10 mL  $\text{TFA}$  with continuous stirring, which was kept refluxing so as to form an optically transparent solution. The resulting solution was dried in an oven at 80 °C for 24 h to obtain  $\text{M}(\text{CF}_3\text{COO})_2$  powders. The same process is also used to prepare  $\text{Ln}(\text{CF}_3\text{COO})_3$  powders.

**Synthesis of  $\text{MF}_2$  seed-nanocrystals by a thermolysis route:** The synthesis was carried out using the standard oxygen-free procedure. A typical procedure was described as follows. A given amount of  $\text{M}(\text{CF}_3\text{COO})_2$  (0.5 mmol) were added into the mixture solution of 10 mL  $\text{OA}$  and 10 mL  $\text{ODE}$  in a three-necked flask (100 mL) at room temperature. Then, the slurry was heated to 100 °C and kept for 30 minutes to remove water and oxygen with vigorous magnetic stirring under vacuum in a temperature-controlled electromantle and thus to form an optically transparent solution. The solution was then heated to 280~310 °C and kept for 1-6 hour under an inert  $\text{N}_2$  atmosphere. On cooling to room temperature, the nanocrystals were precipitated by adding an excess amount of ethanol into the reacted solution, followed by washing with ethanol and cyclohexane and drying in an oven at 80 °C for 24 h. The as-prepared dried nanocrystals can be easily dispersed in various nonpolar organic solvents such as cyclohexane. The  $\text{Yb}^{3+}/\text{Er}^{3+}$ :  $\text{SrF}_2$  seed-nanocrystals were similarly synthesized by introducing the corresponding rare earth trifluoroacetates with designed concentrations to the reaction system.

**Synthesis of MFCl nanocrystals by a MF<sub>2</sub>-seed based chlorination route:** Upon cooling to room temperature for the above-mentioned thermolysis solution, the mixture of 0.5 mmol trichloroacetic acid (TCA), 10 ml OA and 10 ml ODE was quickly added into the solution and then heated at 100 °C for 30 min to remove water and oxygen under vacuum. Subsequently, the chlorination reaction was carried out to fabricate MFCl nanocrystals when heating the solution at 120~280 °C for 30 min. After cooling to room temperature, the nanocrystals were precipitated by adding an excess amount of ethanol into the reacted solution, followed by washing with ethanol and cyclohexane and drying in an oven at 80 °C for 24 h. The as-prepared dried nanocrystals can be easily redispersed in various nonpolar organic solvents such as cyclohexane. The Yb<sup>3+</sup>/Er<sup>3+</sup>: SrFCl nanocrystals were similarly synthesized by adopting Yb<sup>3+</sup>/Er<sup>3+</sup>: SrF<sub>2</sub> nanocrystals as seeds.

**Synthesis of SrFCl nanocrystals by a direct co-thermolysis route:** A given amount of Sr(CF<sub>3</sub>COO)<sub>2</sub> (0.500, 0.250, or 0.125 mmol) and the same mole content of trichloroacetic acid were added into the mixture solution of 10 mL OA and 10 mL ODE in a three-necked flask (100 mL) at room temperature. Then, the slurry was heated at 100 °C for 30 minutes to remove water and oxygen with vigorous magnetic stirring under vacuum in a temperature-controlled electromantle and thus to form an optically transparent solution. The solution was then heated to 280 °C and kept for 30 min under an inert N<sub>2</sub> atmosphere. On cooling to room temperature, the nanocrystals were precipitated by adding an excess amount of ethanol into the reacted solution, followed by washing with ethanol and cyclohexane and drying in an oven at 80 °C for 24 h.

**Synthesis of Yb<sup>3+</sup>/Er<sup>3+</sup>: SrF<sub>2</sub> nanocrystals with the similar size and shape to those of Yb<sup>3+</sup>/Er<sup>3+</sup>: SrFCl ones by a solvothermal route:** For a typical synthesis, an aqueous solution of Sr(NO<sub>3</sub>)<sub>2</sub>, Yb(NO<sub>3</sub>)<sub>3</sub>, Er(NO<sub>3</sub>)<sub>3</sub> (total 0.5 mol/L) was mixed with ethanol (10 mL), oleic acid (10 mL) and NaOA (2.5 g) under thorough stirring. Then, 4mL HF (1.0 mol/L) solution was dropwise added to the mixture. After vigorous stirring at room temperature for about 30 min, the colloidal solution were transferred into a 40 mL Teflon-lined autoclave, sealed and heated at 180 °C for 84 h. The final products were collected by centrifugation, washed several times with ethanol/cyclohexane, and drying in an oven at 80 °C for 24 h. The as-prepared dried nanocrystals can be easily redispersed in various nonpolar organic solvents such as cyclohexane.

**Synthesis of Yb<sup>3+</sup>/Er<sup>3+</sup>: α-NaYF<sub>4</sub> nanocrystals by a solvothermal route:** For a typical synthesis, an aqueous solution of Y(NO<sub>3</sub>)<sub>3</sub>, Yb(NO<sub>3</sub>)<sub>3</sub>, and Er(NO<sub>3</sub>)<sub>3</sub> (total 0.2 mol/L) was mixed with ethanol (5 mL), oleic acid (5 mL) and NaOH (0.3 g) under thorough stirring. Then, 1mL NH<sub>4</sub>F (2.0 mol/L) solution was dropwise added to the mixture. After vigorous stirring at room temperature for about 30 min, the colloidal solution were transferred into a 20 mL Teflon-lined autoclave, sealed and heated at 160 °C for 12 h. The final products were collected, washed several times with ethanol/cyclohexane, and purified by centrifugation.

**Characterizations:** XRD analysis was carried out with a powder diffractometer (DMAX2500 RIGAKU) using CuKα radiation (λ=0.154 nm). The size and shape of the samples were observed by a transmission electron microscope (TEM, JEM-2010) equipped with an energy dispersive x-ray spectroscopy (EDS). TEM specimens were prepared by directly drying a drop of a dilute cyclohexane dispersion solution of the products on the surface of a carbon-coated copper grid. Upconversion luminescence spectra were carried out upon 980 nm excitation with a pump power of ~200 mW (power density ~20 W/cm<sup>2</sup>), provided by a power-controllable 980 nm diode laser (DPL-II, Module-HTL98M10) with the maximum power output of 9 W. To enable comparison of the upconversion emission intensities among different samples, the emission spectra were measured

with the same instrumental parameters (for example: same excitation wavelength and power, same excitation and emission slits). Upconversion decay lifetimes were measured with a customized UV to mid-infrared steady-state and phosphorescence lifetime spectrometer (FSP920-C, Edinburgh) equipped with a digital oscilloscope (TDS3052B, Tektronix) and a tunable mid-band OPO pulse laser as excitation source (410-2400 nm, 10 Hz, pulse width  $\leq 5$  ns, Vibrant 355II, OPOTEK). All photoluminescence studies were carried out at room temperature.

**Figure S1-S13**

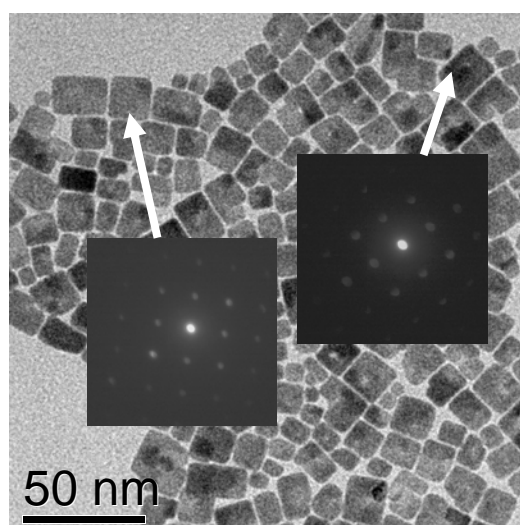

**Figure S1.** TEM micrograph of SrFCl NCs, insets shows NBED patterns of two different NCs

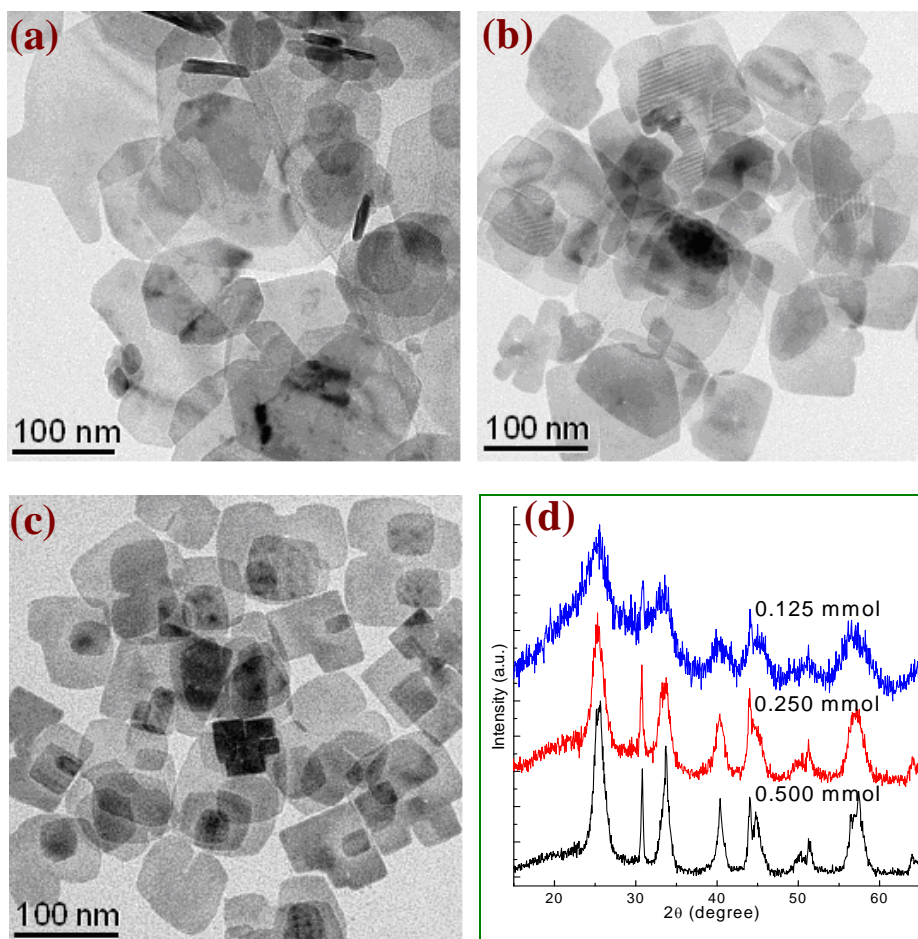

**Figure S2.** TEM micrographs of SrFCl NCs prepared by direct co-thermolysis of  $x$  mol%  $\text{Sr}(\text{CF}_3\text{COO})_2$  and  $x$  mol% TCA in OA and ODE solution: (a)  $x=0.500$ , (b)  $x=0.250$ , (c)  $x=0.125$ . (d) XRD patterns of the corresponding SrFCl samples.

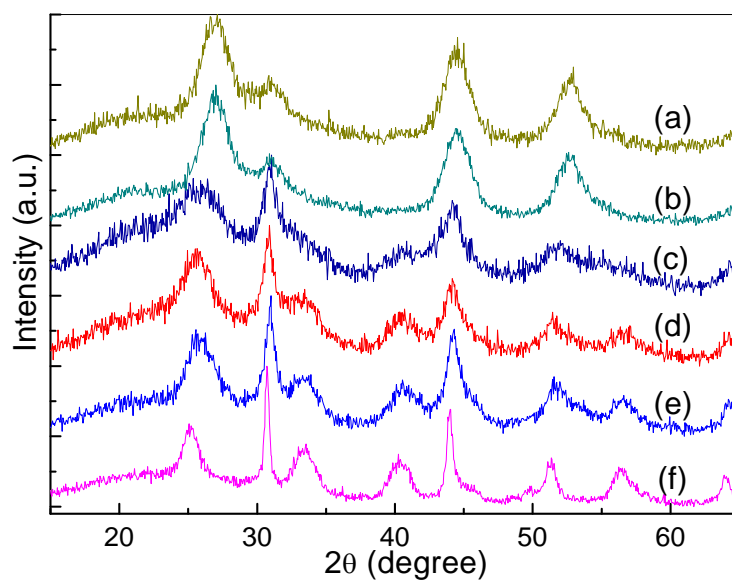

**Figure S3.** XRD patterns of the  $\text{SrF}_2$  seed-based chlorination products obtained by heating at various temperatures: (a) un-treated, (b) 120 °C, (c) 160 °C, (d) 200 °C, (e) 240 °C, and (f) 280 °C.

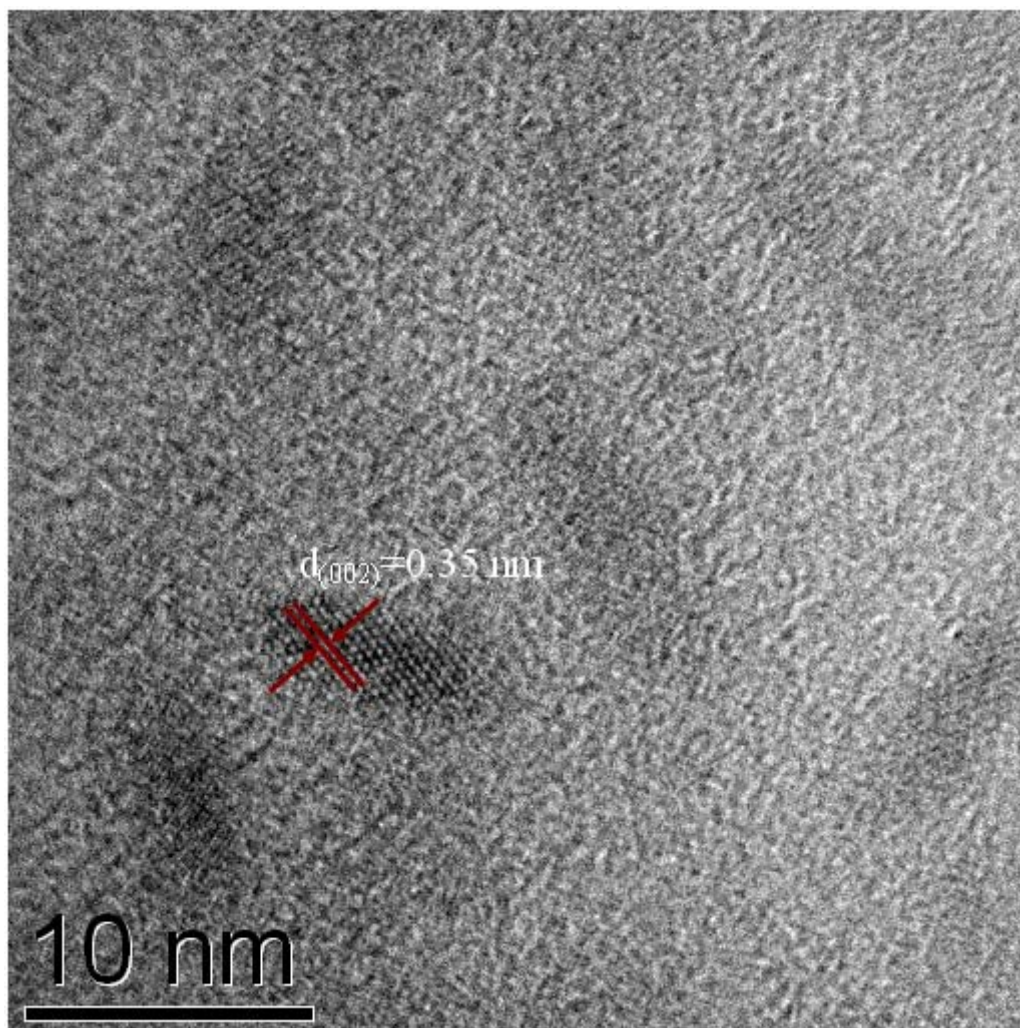

**Figure S4.** HRTEM image of the chlorination product obtained by heating at 160 °C, showing the co-existence of the  $\text{SrFCl}$  nanocrystals and the amorphous phase. The measured interplanar spacing of  $\sim 0.35 \text{ nm}$ , corresponding to the distance of (002) plane of tetragonal  $\text{SrFCl}$ , is also provided.

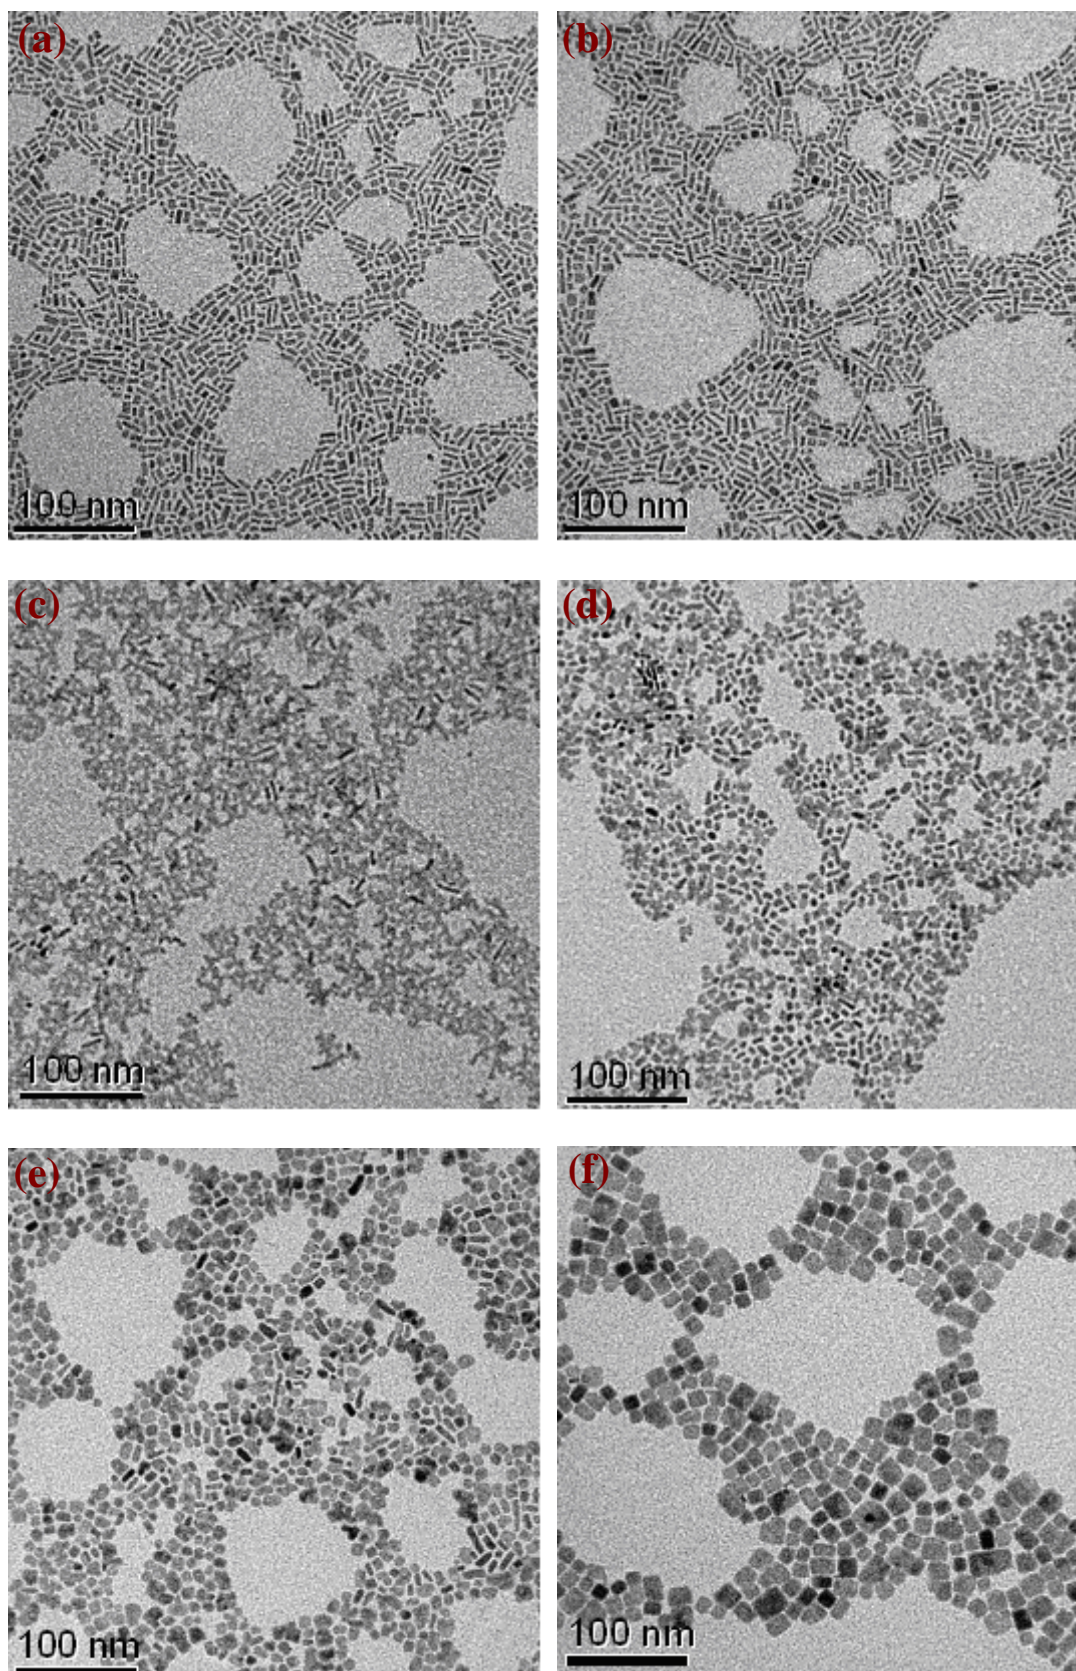

**Figure S5.** TEM micrographs of  $\text{SrF}_2$  nanorod-based chlorination products obtained by heating at various temperatures: (a) un-treated, (b) 120 °C, (c) 160 °C, (d) 200 °C, (e) 240 °C and (f) 280 °C.

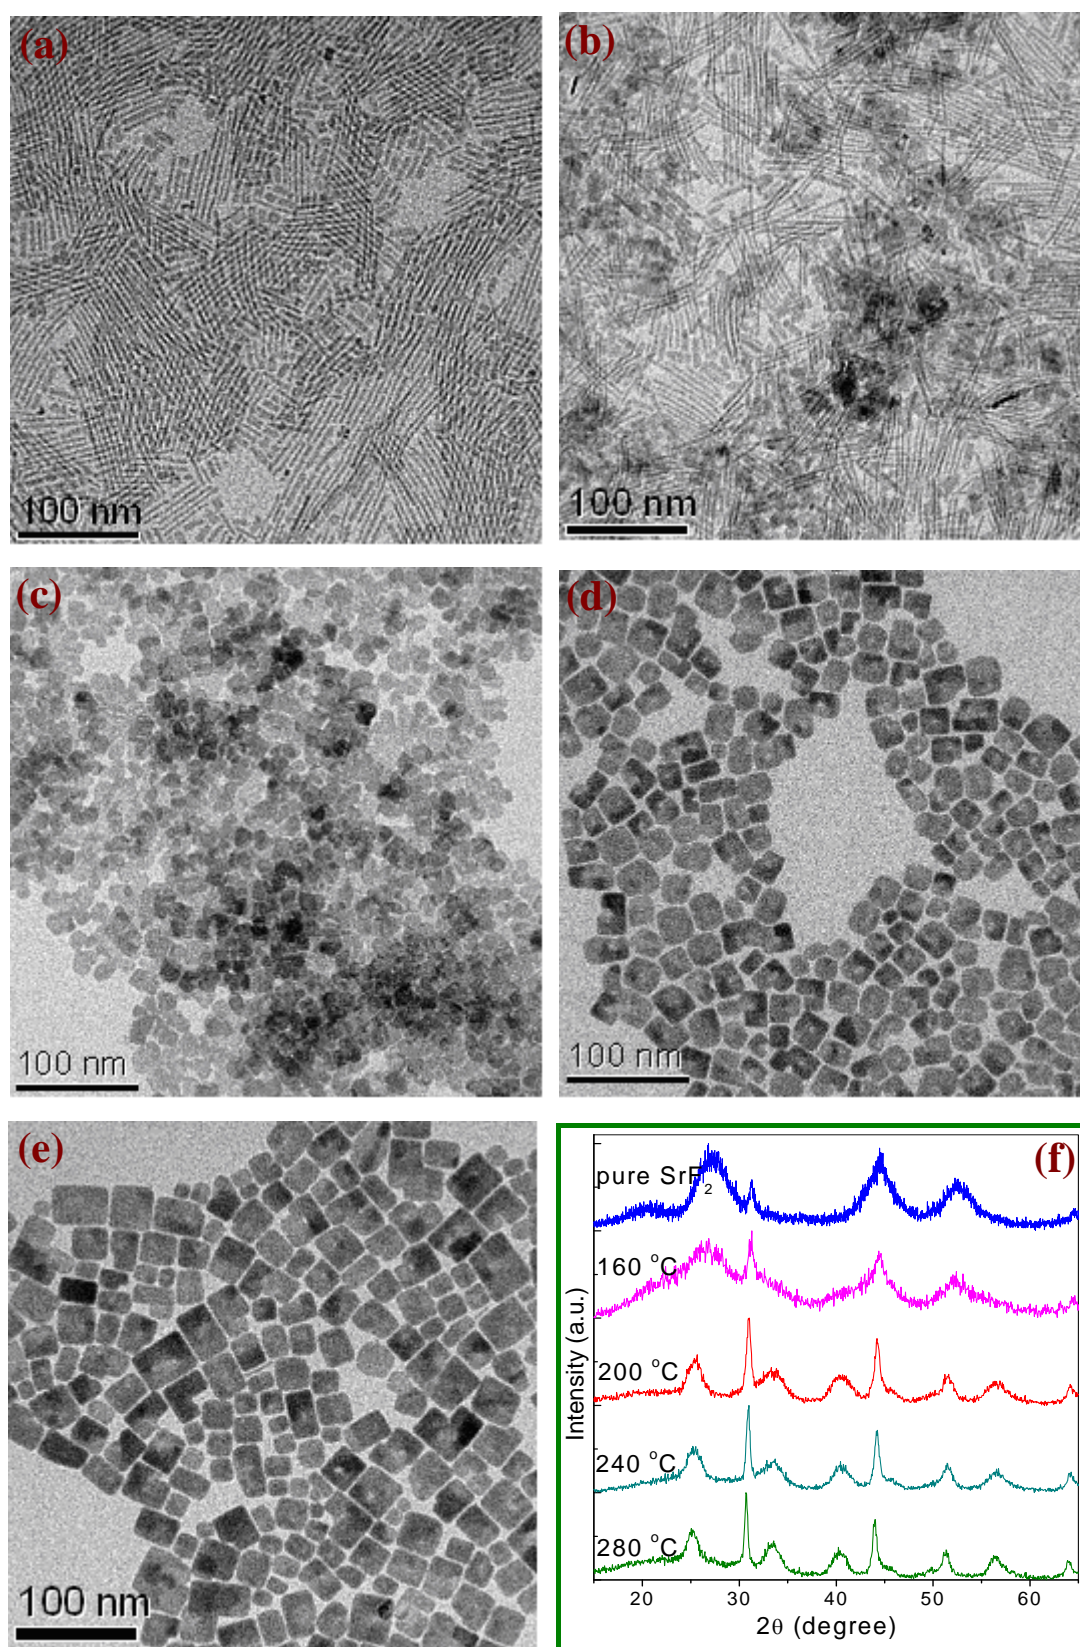

**Figure S6.** (a)-(e) TEM micrographs of SrF<sub>2</sub> nanowire-based chlorination products obtained by heating at various temperatures: (a) un-treated, (b) 160 °C, (c) 200 °C, (d) 240 °C and (e) 280 °C. (f) XRD patterns of the corresponding samples. Noticeably, the chlorination reaction is not complete at 160 °C, i.e., Only part of SrF<sub>2</sub> nanowires are chlorinated into SrFCl ones at this temperature.

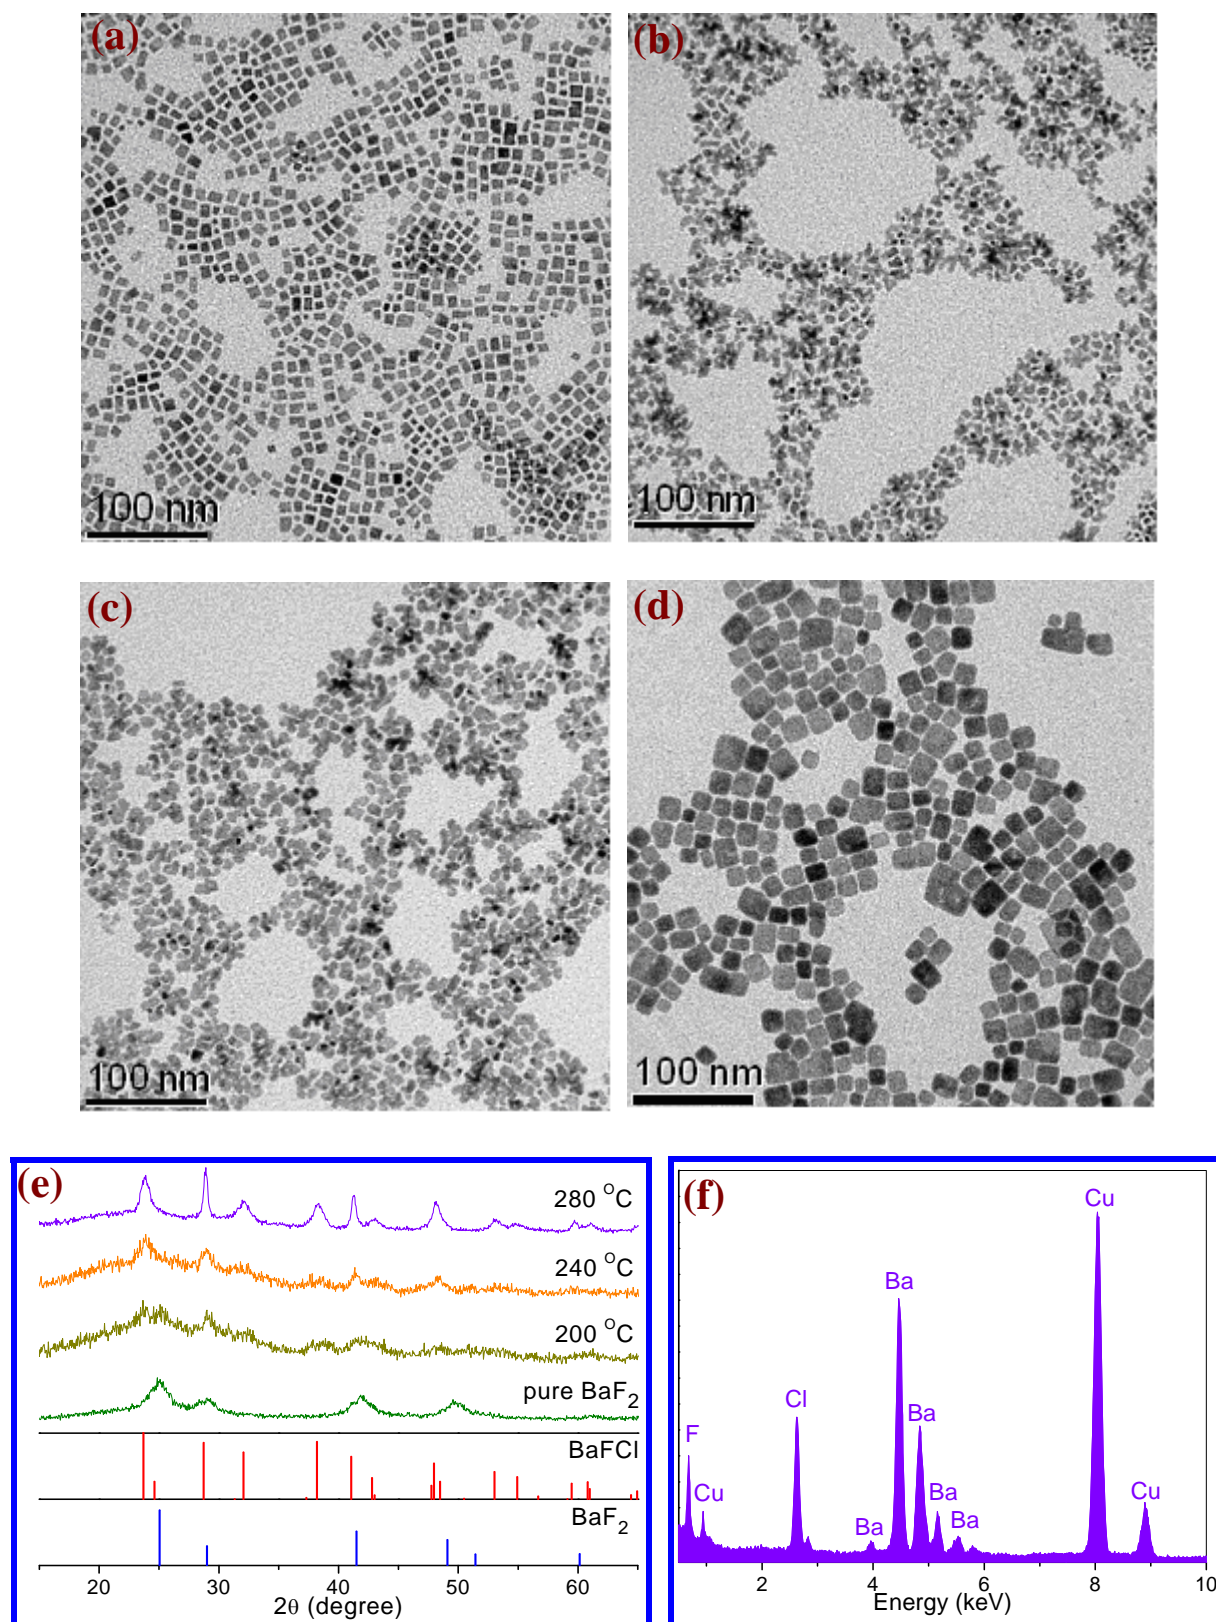

**Figure S7.** (a)-(d) TEM micrographs of BaF<sub>2</sub> nanocube-based chlorination products obtained by heating at various temperatures: (a) un-treated, (b) 200 °C, (c) 240 °C and (d) 280 °C. (e) XRD patterns of the corresponding samples; the standard cubic BaF<sub>2</sub> crystal data (JCPDS 88-2466) and the standard tetragonal BaFCl crystal data (JCPDS 84-0631) are also provided. (f) EDS spectrum

taken from sample (d), showing the existence of Ba, F, and Cl signals (Cu signals come from the copper grid).

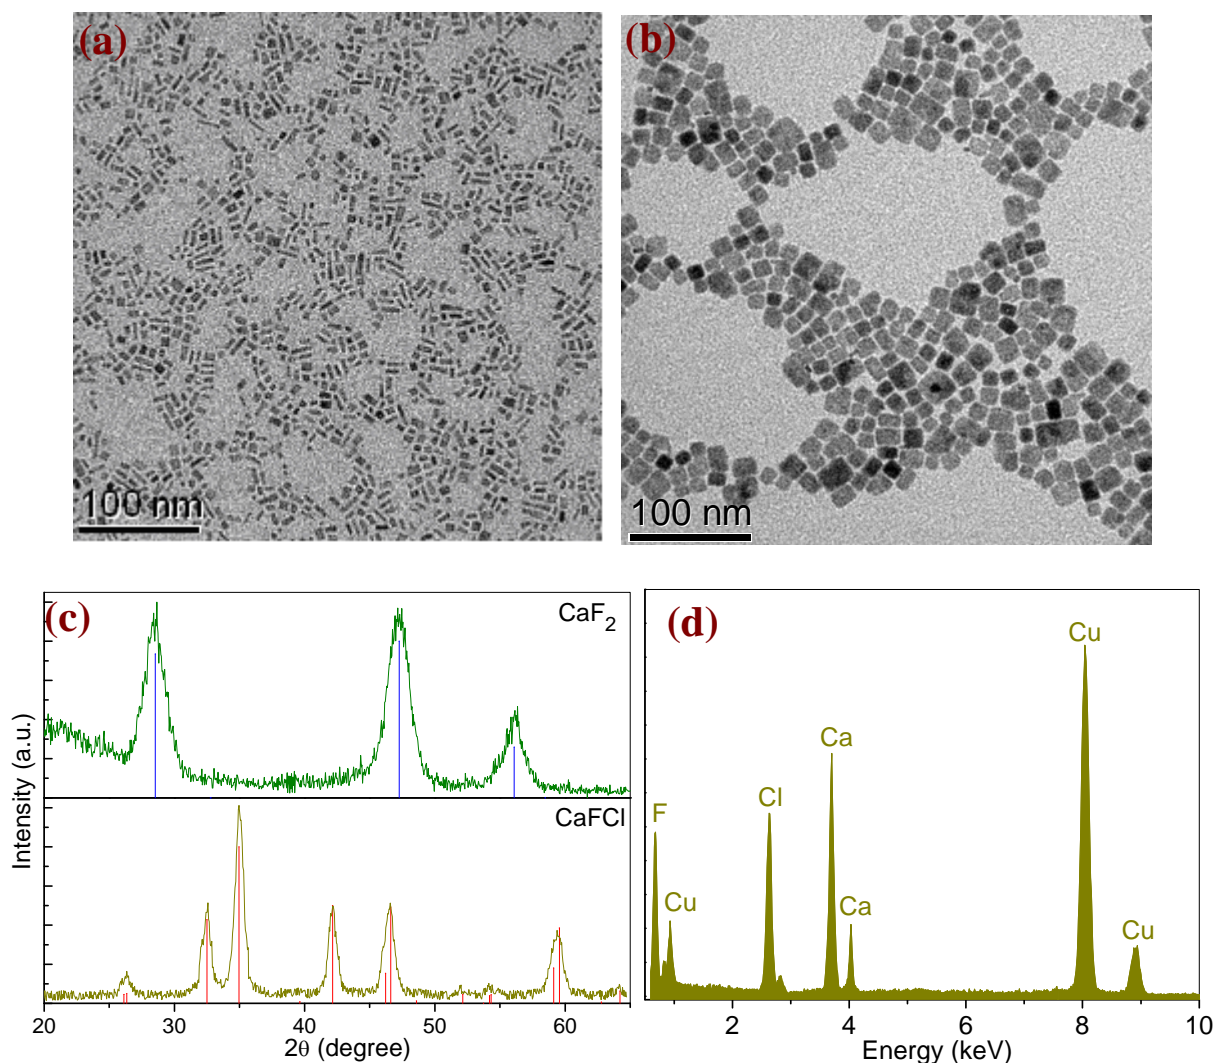

**Figure S8.** TEM micrographs of (a) CaF<sub>2</sub> precursor NCs, and (b) chlorination product CaFCl NCs. (c) XRD patterns of the corresponding samples; the standard cubic CaF<sub>2</sub> crystal data (JCPDS 35-0816) and the standard tetragonal CaFCl crystal data (JCPDS 70-0483) are also provided. (e) EDS spectrum taken from CaFCl NCs, showing the existence of Ca, F, and Cl signals (Cu signals come from the copper grid).

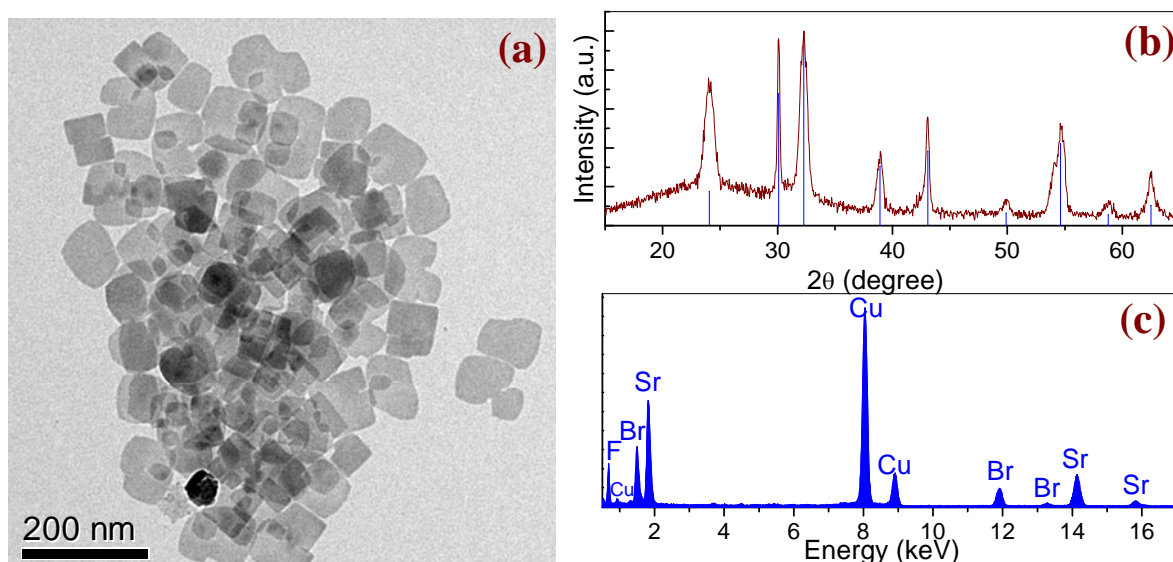

**Figure S9.** (a) TEM micrograph of  $\text{SrF}_2$  seed-based bromination product  $\text{SrFBr}$  NCs. (b) XRD pattern of  $\text{SrFBr}$  NCs; the standard tetragonal  $\text{SrFBr}$  crystal data (JCPDS 76-1287) are also provided. (c) EDS spectrum taken from  $\text{SrFBr}$  NCs, showing the existence of Sr, F, and Br signals (Cu signals come from the copper grid).

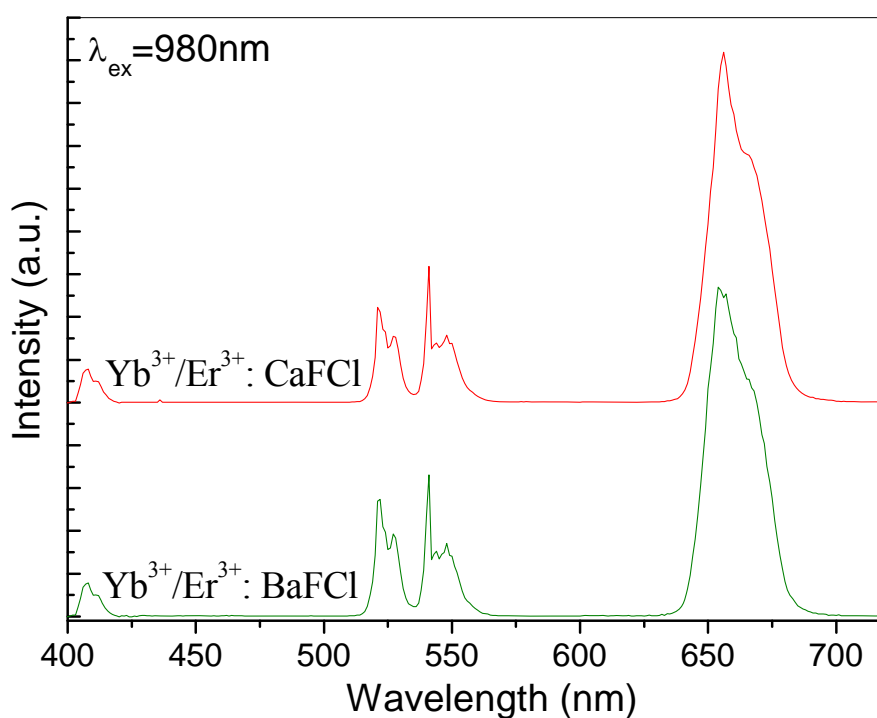

**Figure S10.** UC emission spectra of  $\text{Yb}^{3+}/\text{Er}^{3+}$  (20/2 mol%) co-doped  $\text{CaFCl}$  and  $\text{BaFCl}$  NCs

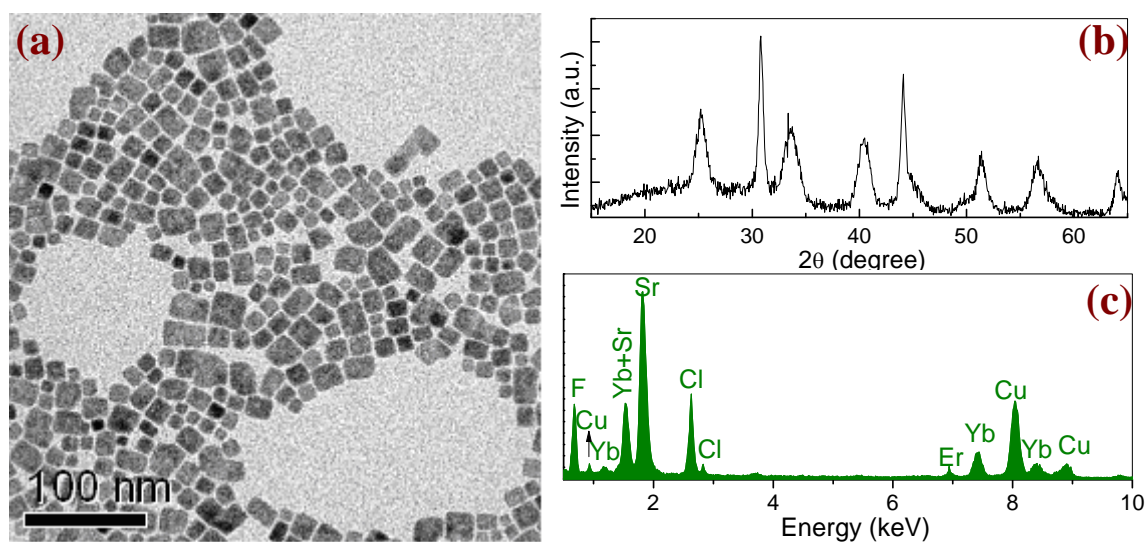

**Figure S11.** (a) TEM micrograph, (b) XRD pattern, and (c) EDS spectrum of  $\text{Yb}^{3+}/\text{Er}^{3+}:\text{SrFCl}$  nanocubes. EDS spectrum evidences the existence of Sr, F, Cl, Yb and Er signals (Cu signals come from the copper grid).

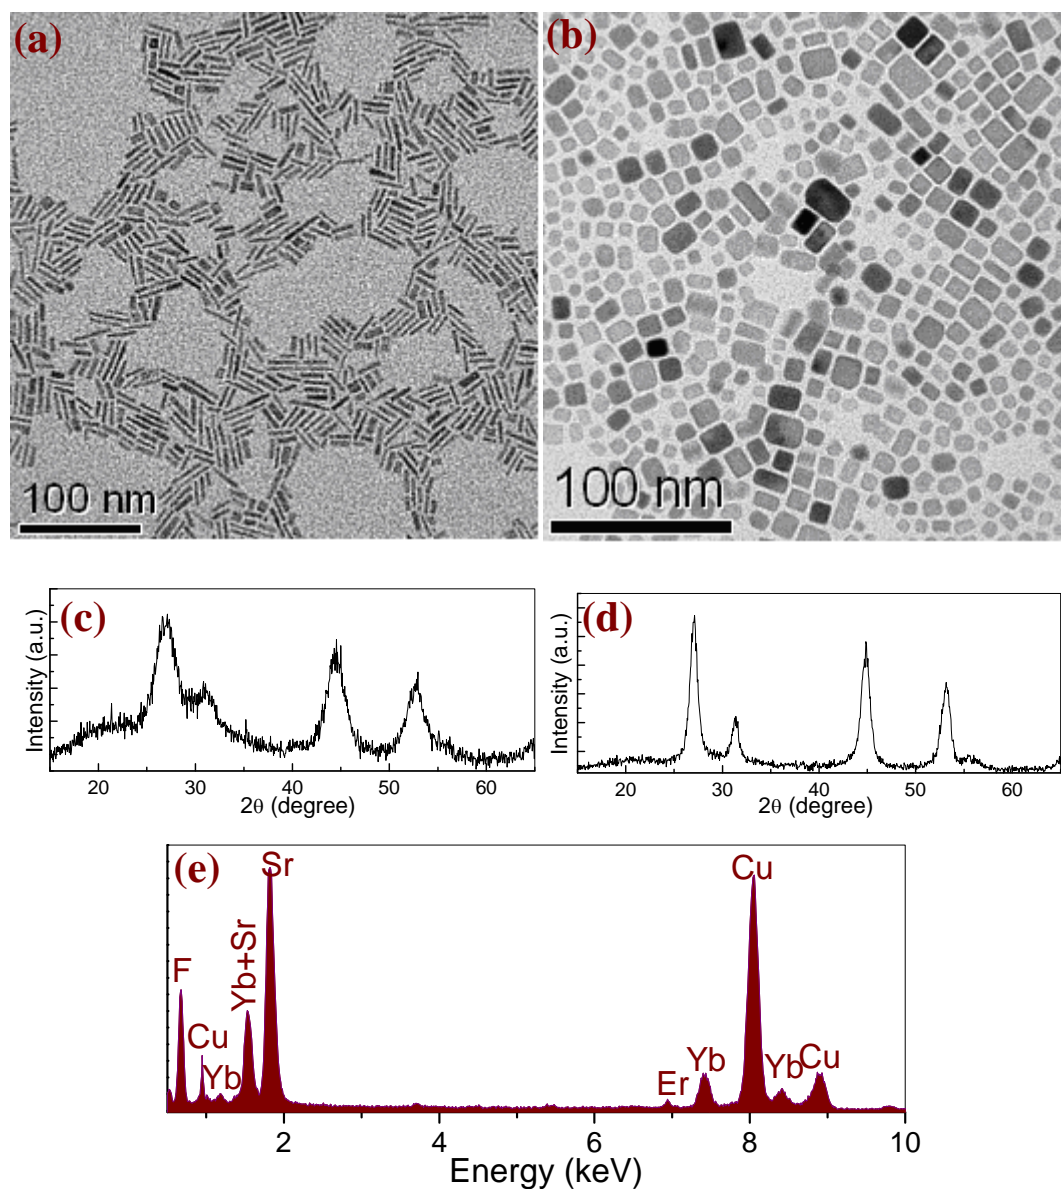

**Figure S12.** TEM micrographs of (a)  $\text{Yb}^{3+}/\text{Er}^{3+}$ :  $\text{SrF}_2$  seed nanorods, and (b)  $\text{Yb}^{3+}/\text{Er}^{3+}$ :  $\text{SrF}_2$  nanocubes with the same size to that of  $\text{Yb}^{3+}/\text{Er}^{3+}$ :  $\text{SrFCl}$  nanocubes. (c)-(d) XRD patterns of these two  $\text{SrF}_2$  samples; (e) EDS spectrum taken from sample (b), showing the existence of Sr, F, Yb and Er signals (Cu signals come from the copper grid).

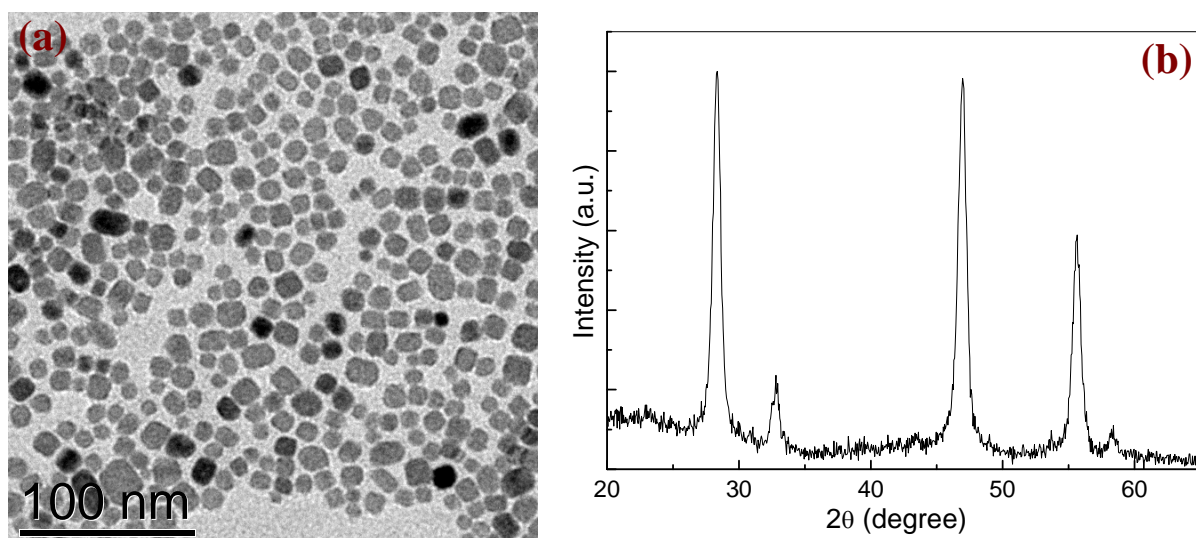

Figure S13. (a) TEM micrograph and (b) XRD pattern of  $\text{Yb}^{3+}/\text{Er}^{3+}$  co-doped  $\alpha\text{-NaYF}_4$  NCs
